# Supplementary material
Source: PubMed Central journal article supplement (PMC3008499)

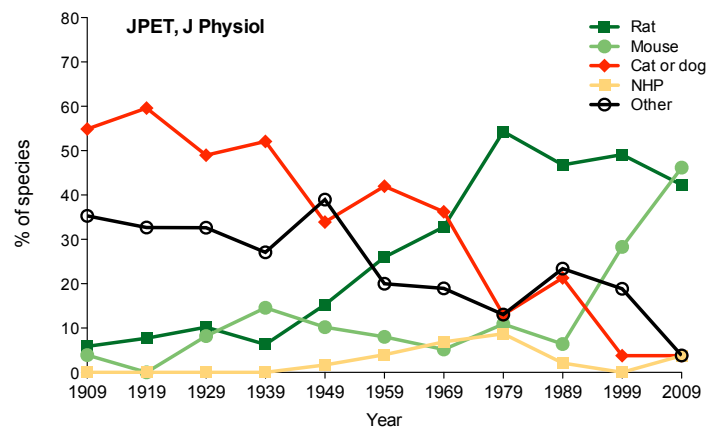

Supplement: NIHMS230882-supplement-01.pdf [file NIHMS230882-supplement-01.pdf]
